# Supplementary material for: Design of a novel fuel cell-Fenton system: a smart approach to zero energy depollution
Source: Royal Society of Chemistry journal article supplement (doi:10.1039/c6ta05443a), 2016-01-01
Supplement: c6ta05443a1.pdf [file c6ta05443a1.pdf]

## Supporting Information

### Design of novel Fuel Cell-Fenton system: a smart approach to zero energy depollution

*Thi Xuan Huong Le, Roseline Esmilaire, Martin Drobek, Mikhael Bechelany, Cyril Vallicari,  
Duy Linh Nguyen, Anne Julbe, Sophie Tingry, Marc Cretin*

#### 1. Physical characterization of CF@Au anode

##### 1.1. CF@Au anode before use in Fuel Cell-Fenton system

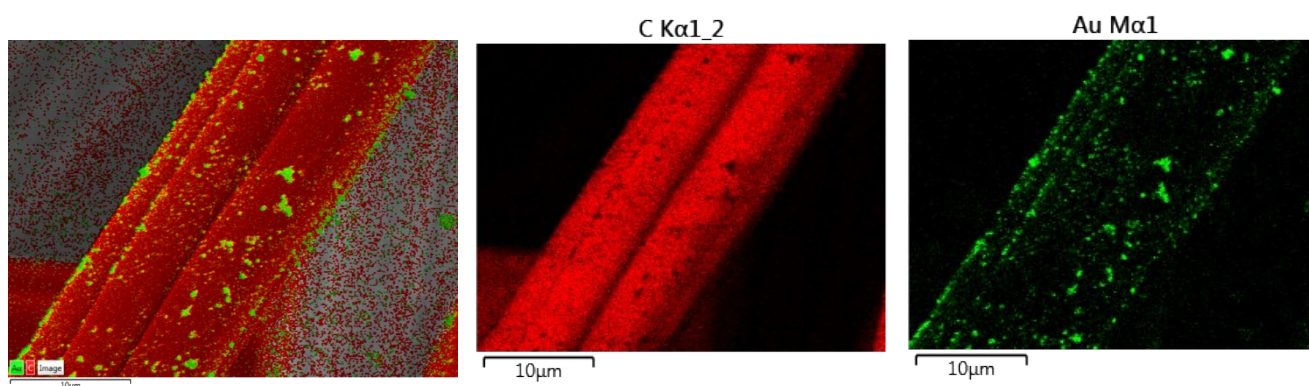

**Figure S1.** EDX mapping of carbon and gold elements on the surface of CF@Au anode.

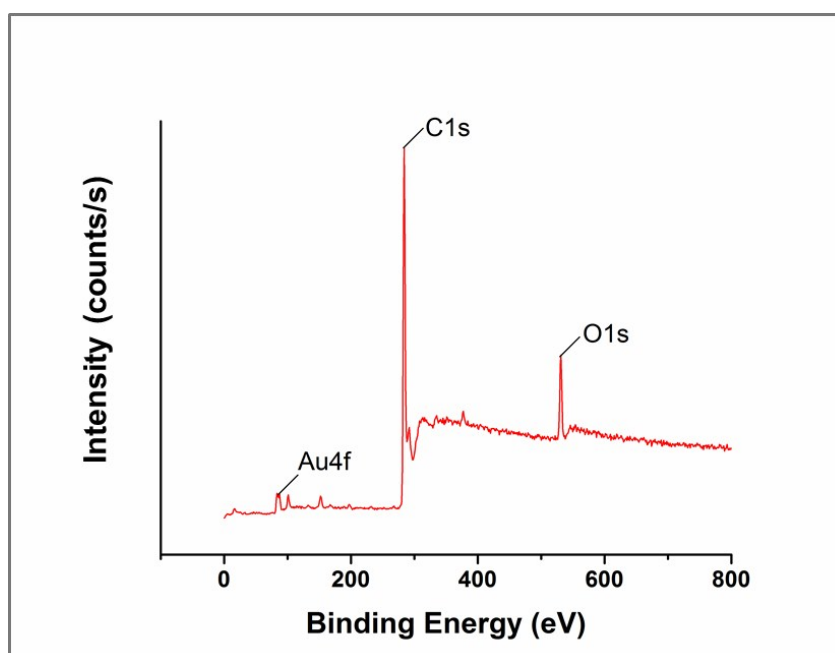

**Figure S2.** XPS spectrum of CF@Au anode.

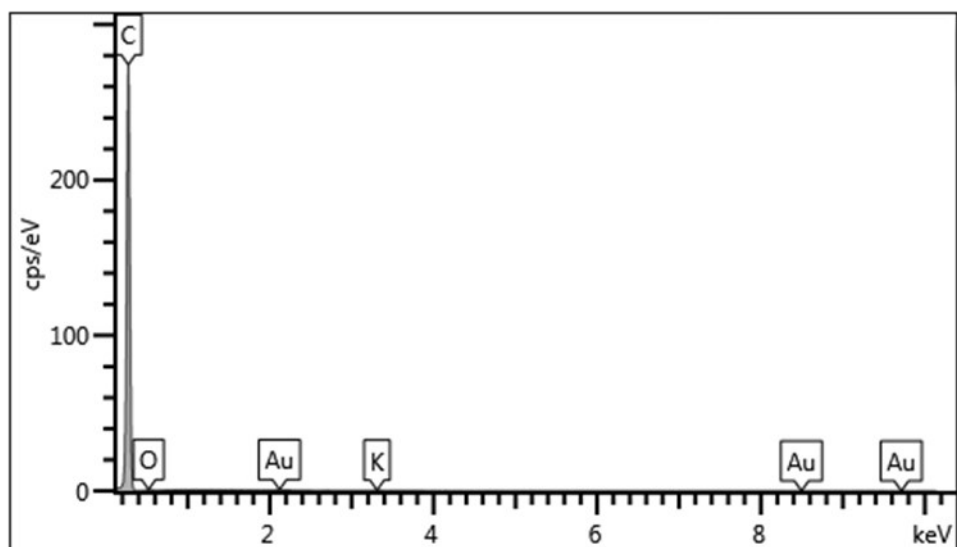

**Figure S3.** EDX analysis of CF@Au anode.

**Table S1** – Elemental composition of CF@Au anode (from EDX analysis)

| Element | % Mass | % Atomic |
|---------|--------|----------|
| C       | 98.81  | 99.49    |
| O       | 0.57   | 0.43     |
| K       | 0.17   | 0.05     |
| Au      | 0.44   | 0.03     |
| Total:  | 100.00 | 100.00   |

**1.2. CF@Au anode after two months use in Fuel Cell-Fenton system**

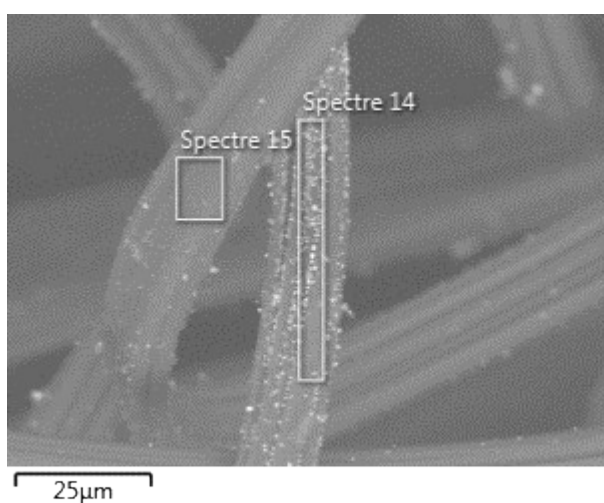

**Figure S4.** SEM image of CF@Au anode after two months use in Fuel Cell-Fenton system.

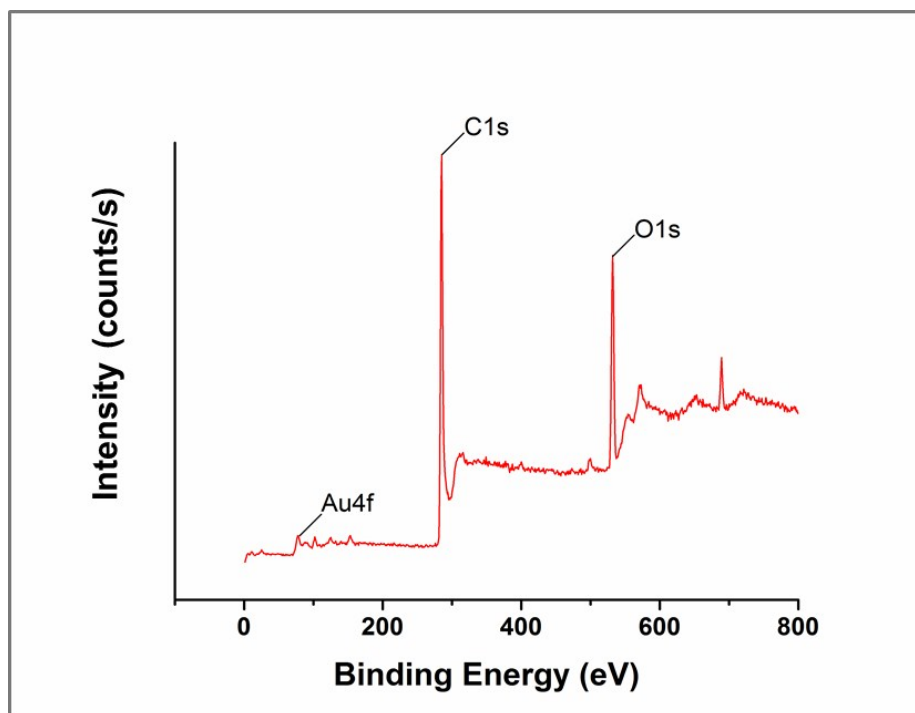

**Figure S5.** XPS spectrum of CF@Au anode after two months use in Fuel Cell-Fenton system.

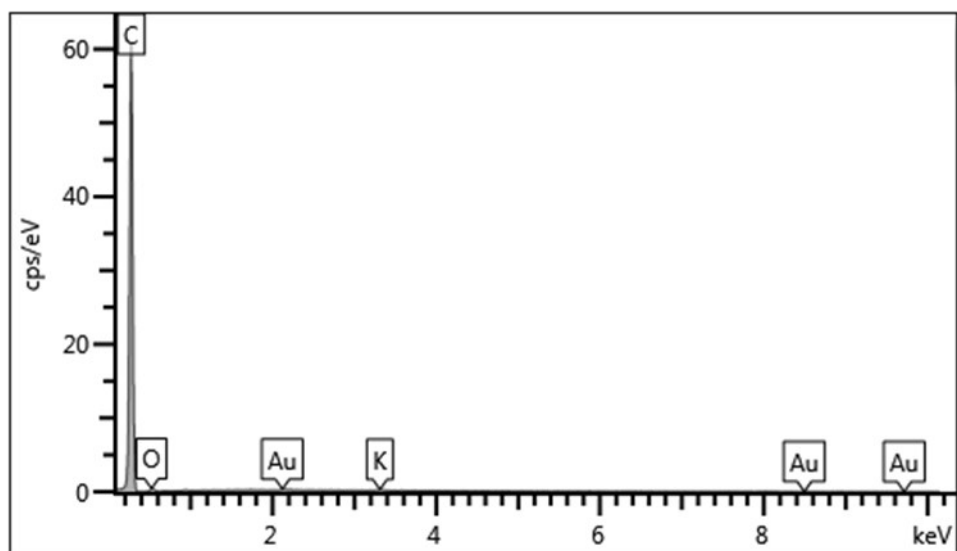

**Figure S6.** EDX analysis of CF@Au anode after two months use in Fuel Cell-Fenton system.

**Table S2** – Elemental composition of CF@Au anode after two months use in Fuel Cell-Fenton system (from EDX analysis).

| Element | % Mass | % Atomic |
|---------|--------|----------|
| C       | 97.45  | 98.53    |
| O       | 1.75   | 1.33     |
| K       | 0.36   | 0.11     |
| Au      | 0.44   | 0.03     |
| Total:  | 100.00 | 100.00   |

## 2. Physical characterization of CF@pC cathode

### 2.1. CF@pC cathode before use in Fuel Cell-Fenton system

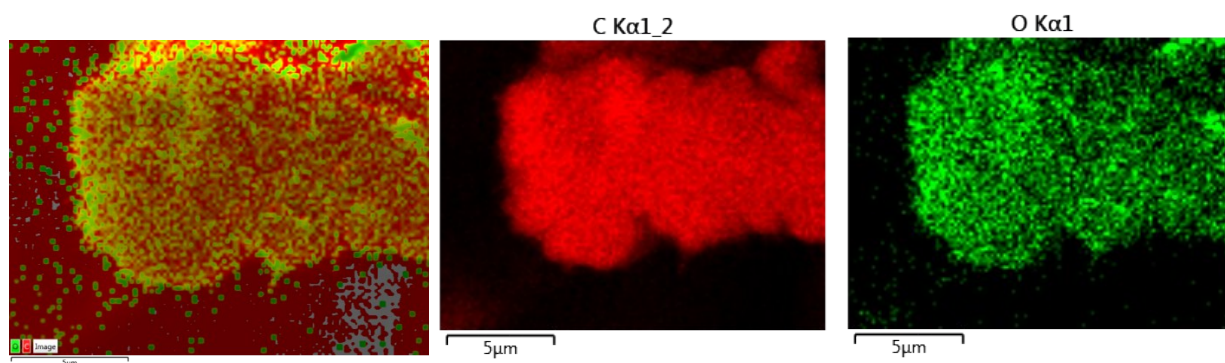

**Figure S7.** EDX mapping of carbon and oxygen composition on the surface of CF@pC cathode.

**Table S3** – Elemental composition of CF@pC cathode (from EDX analysis).

| Element | % Mass | % Atomic |
|---------|--------|----------|
| C       | 95.12  | 96.29    |
| O       | 4.88   | 3.71     |
| Total:  | 100.00 | 100.00   |

## 2.2. CF@pC cathode after two months use in Fuel Cell-Fenton system

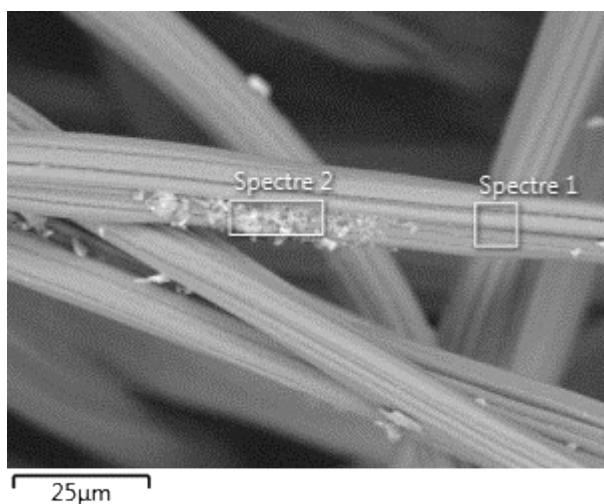

**Figure S8.** SEM image of CF@pC cathode after two months use in Fuel Cell-Fenton system.

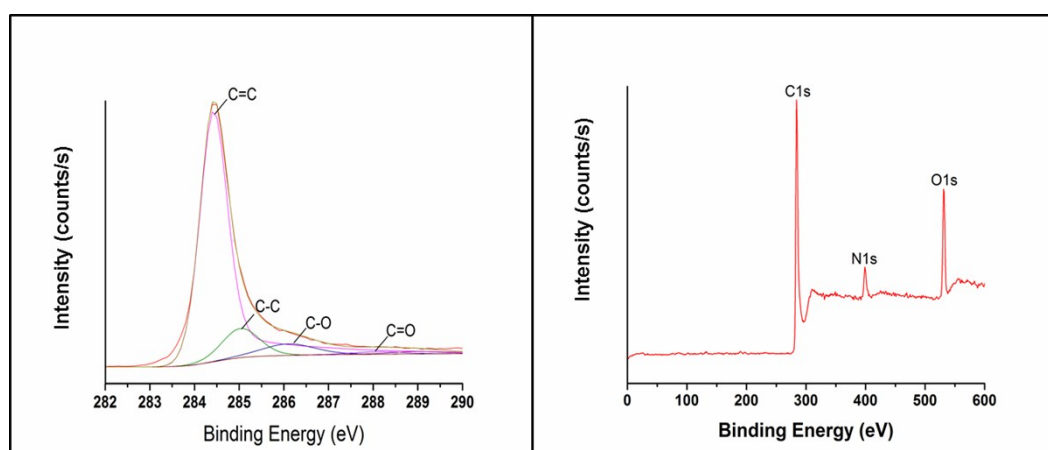

**Figure S9.** XPS spectra of CF@pC cathode after two months use in Fuel Cell-Fenton system.

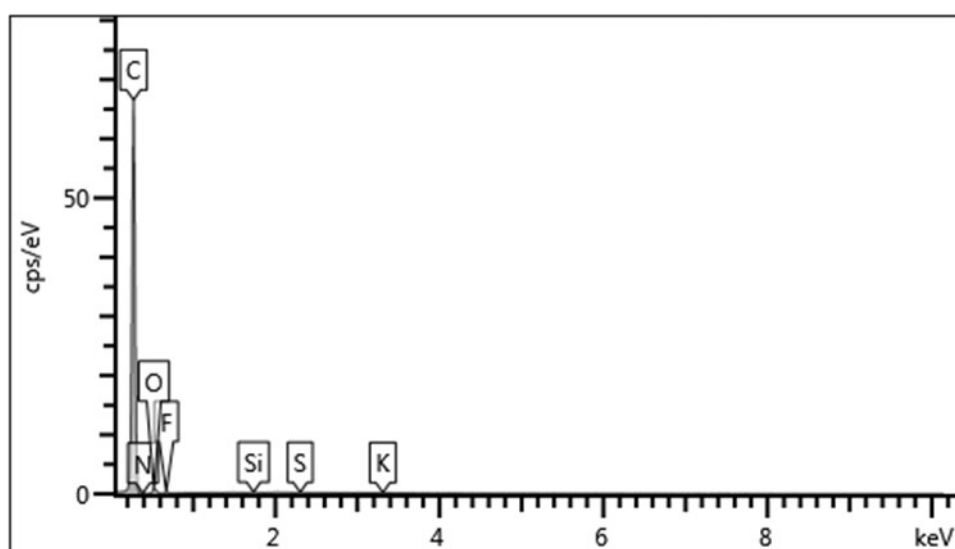

**Figure S10.** EDX analysis of CF@pC cathode after two months use in Fuel Cell-Fenton system.

**Table S4** – Elemental composition of CF@pC cathode after two months use in Fuel Cell-Fenton System (from EDX analysis).

| Element | % Mass | % Atomic |
|---------|--------|----------|
| C       | 94.30  | 95.80    |
| O       | 3.05   | 2.32     |
| N       | 1.25   | 1.09     |
| F       | 0.99   | 0.63     |
| Si      | 0.13   | 0.05     |
| S       | 0.13   | 0.05     |
| K       | 0.16   | 0.05     |
| Total:  | 100.00 | 100.00   |
